# Supplementary material
Source: Springer Nature journal article supplement (https://www.springermedizin.de/resource/supplementary/13099_2012_78_MOESM6_ESM.pdf/9665504)

**A**

Days

0

2

MUC1

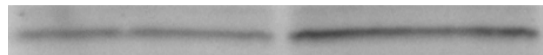

MUC2

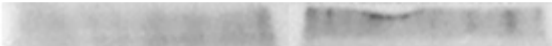 $\beta$ -Actin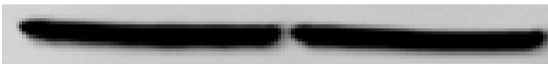**B**

| Mucin | Relative expression |                                 |
|-------|---------------------|---------------------------------|
|       | Day 0 (% $\pm$ SEM) | Day 2 (% $\pm$ SEM)             |
| MUC1  | 100.0 $\pm$ 0.5     | 108.0 $\pm$ 0.6 ( $p = 0.016$ ) |
| MUC2  | 100.0 $\pm$ 5.1     | 102.6 $\pm$ 6.1 ( $p = 0.67$ )  |

Supplement: MOESM6 [file 9665504]
